# Supplementary material for: Oxidative stress resistance prompts pyrroloquinoline quinone biosynthesis in Hyphomicrobium denitrificans H4-45
Source: Springer Nature journal article supplement (doi:10.1007/s00253-024-13053-1), 2024-02-13
Supplement: MOESM1 [file 253_2024_13053_MOESM1_ESM.pdf]

## Supplementary data

Oxidative stress resistance prompts pyrroloquinoline quinone biosynthesis  
in *Hyphomicrobium denitrificans* H4-45

Jiale Liang<sup>1</sup>, Mingjie Tang<sup>1</sup>, Lang Chen<sup>1</sup>, Wenjie Wang<sup>1\*</sup>, Xinle Liang<sup>1\*</sup>

<sup>1</sup> School of Food Science and Biotechnology, Zhejiang Gongshang University,  
Hangzhou, 210018, China

\*Corresponding author.

Email: wenjiewang@mail.zjgsu.edu.cn (Wenjie Wang)

E-mail: dbiot@mail.zjgsu.edu.cn (Xinle Liang)

Phone: 86-571-8807-1024

Fax: 86-571-8820-6627

**Table S1** All strains used in this study

| Strains                       | Description                                                                   | Sources    |
|-------------------------------|-------------------------------------------------------------------------------|------------|
| <i>H. denitrificans</i> H4-45 | Wild type                                                                     | This study |
| <i>H. denitrificans</i> AC-6  | Best-performing isolate in the first stage of<br>UV-LiCl mutagenesis and ALE  | This study |
| <i>H. denitrificans</i> AD-17 | Best-performing isolate in the second stage<br>of UV-LiCl mutagenesis and ALE | This study |
| <i>H. denitrificans</i> AE-9  | Best-performing isolate in the third stage of<br>UV-LiCl mutagenesis and ALE  | This study |

## **Figure Legends**

**Fig. S1** Effects of different UV treatment times on the mortality of strain H4-45

**Fig. S2** Determination of initial concentration of three screening stress in the three rounds of ALE: (a) Kanamycin, (b) Na<sub>2</sub>S (c) K<sub>2</sub>TeO<sub>3</sub>

**Fig. S3** Standard curve of PQQ measured by HPLC with different PQQ concentrations (9.4 mg/L, 18.8 mg/L, 37.5 mg/L, 75 mg/L, 150 mg/L, 300 mg/L)

**Fig. S4** PQQ production of selected strains after the first stage of UV-LiCl mutagenesis and ALE

**Fig. S5** PQQ production of selected strains after the second stage of UV-LiCl mutagenesis and ALE

**Fig. S6** Genetic stability of mutant strain AE-9 after nine consecutive passages

**Fig. S7** OD<sub>600</sub> of mutant strain AE-9 in the MM medium with no pressure, full concentration of kanamycin+Na<sub>2</sub>S+K<sub>2</sub>TeO<sub>3</sub> treatment, and half concentration of kanamycin+Na<sub>2</sub>S+K<sub>2</sub>TeO<sub>3</sub> treatment

**Fig. S8** Batch fermentation of PQQ production in a 3.7 L bioreactor without pH adjustment

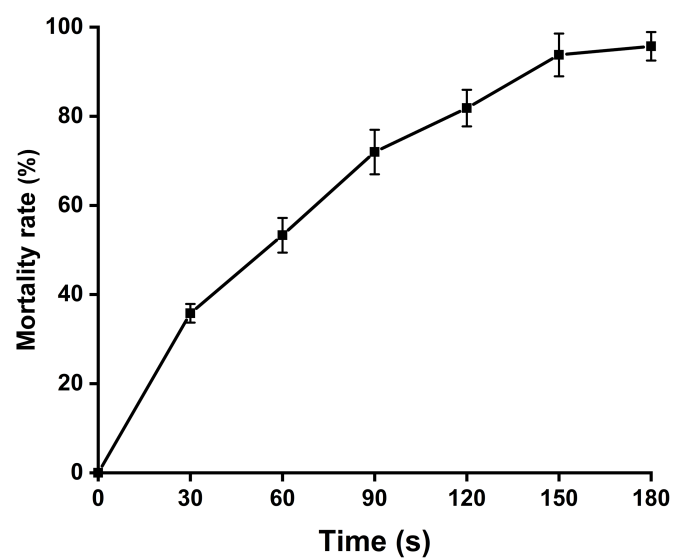

**Fig. S1** Effects of different UV treatment times on the mortality of strain H4-45

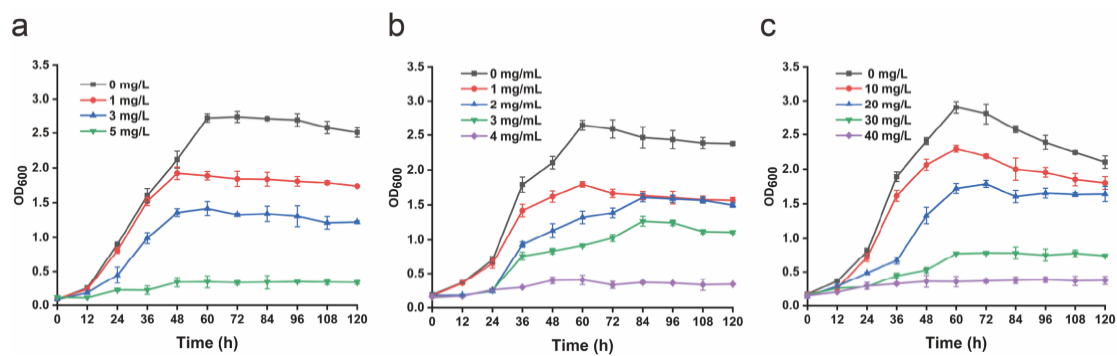

**Fig. S2** Determination of initial concentration of three screening stress in the three rounds of ALE: (a) Kanamycin, (b) Na<sub>2</sub>S (c) K<sub>2</sub>TeO<sub>3</sub>

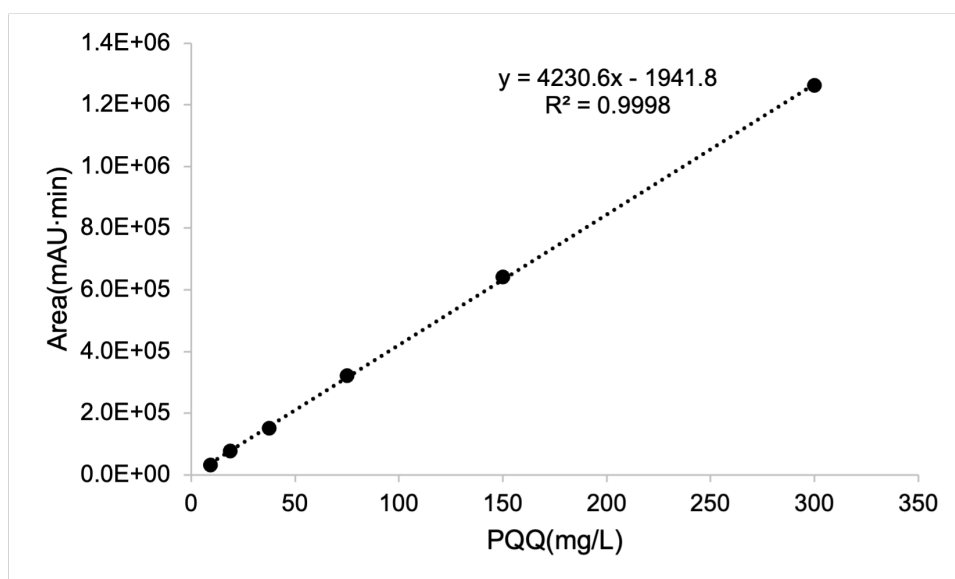

**Fig. S3** Standard curve of PQQ measured by HPLC with different PQQ concentrations (9.4 mg/L, 18.8 mg/L, 37.5 mg/L, 75 mg/L, 150 mg/L, 300 mg/L).

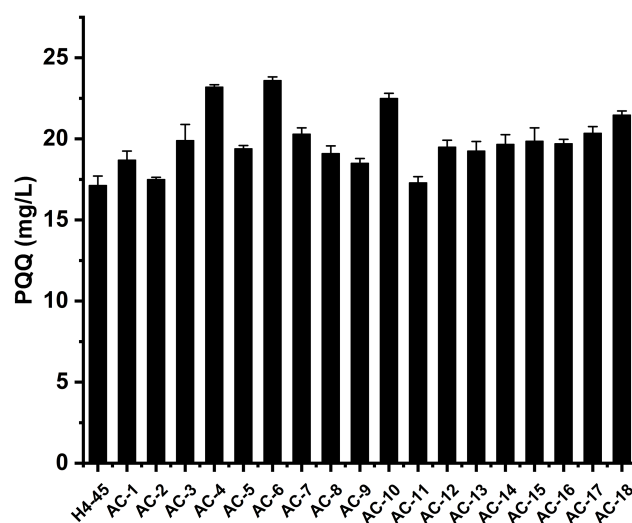

**Fig. S4** PQQ production of selected strains after the first stage of UV-LiCl mutagenesis and ALE

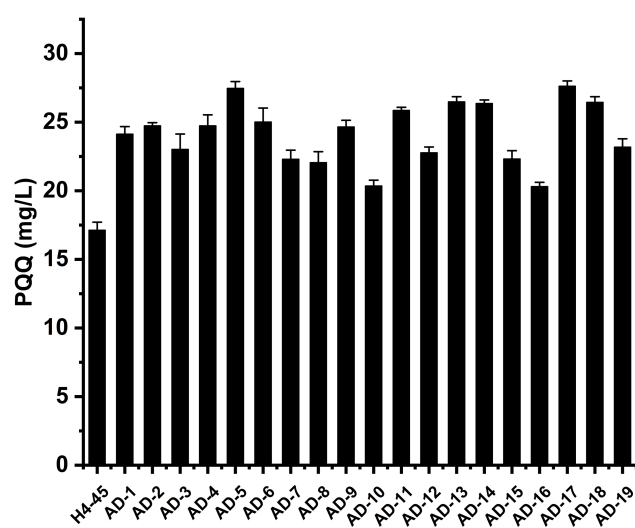

**Fig. S5** PQQ production of selected strains after the second stage of UV-LiCl mutagenesis and ALE

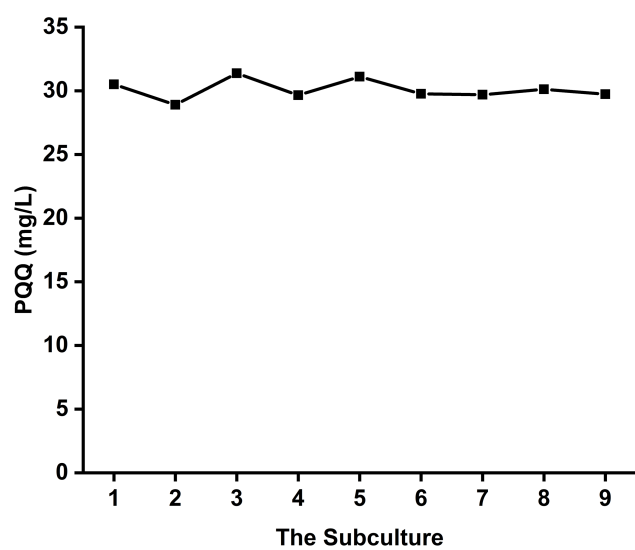

**Fig. S6** Genetic stability of mutant strain AE-9 after nine consecutive passages

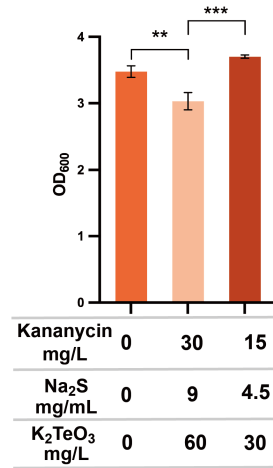

**Fig. S7** OD<sub>600</sub> of mutant strain AE-9 in the MM medium with no pressure, full concentration of kanamycin+Na<sub>2</sub>S+K<sub>2</sub>TeO<sub>3</sub> treatment, and half concentration of kanamycin+Na<sub>2</sub>S+K<sub>2</sub>TeO<sub>3</sub> treatment.

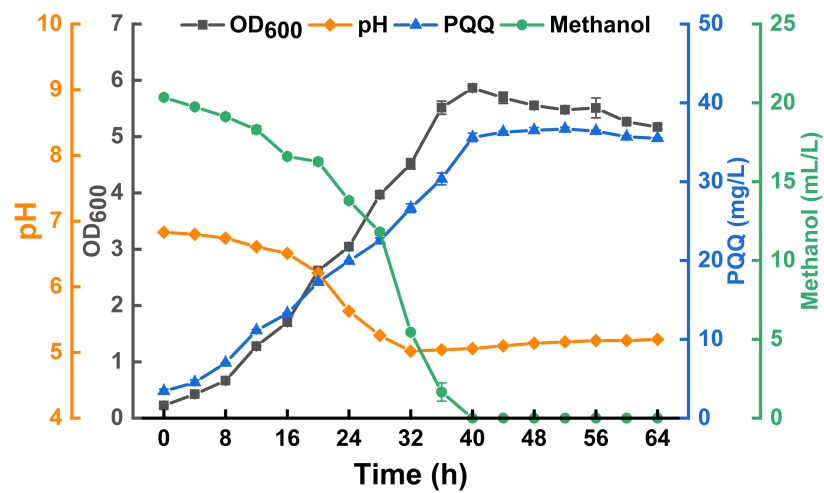

**Fig. S8** Batch fermentation of PQQ production in a 3.7 L bioreactor without pH adjustment.
